# Supplementary material
Source: Research Square preprint supplement (doi:10.21203/rs.3.rs-9491112/v1)
Supplement: Supplementary file 1 [file 00fcdc0ef9b6acc89e547fc7.docx]

| Name | Manufacturer |
| --- | --- |
| ECL chemiluminescent substrate | Glpbio,USA |
| β-actin antibody | Abmart,China |
| MSMO1 antibody | Proteintech,China |
| GPX4 antibody | Abmart,China |
| CD9 antibody | Abcam,United Kingdom |
| CD81 antibody | Abcam,United Kingdom |
| TSG101 antibody | Abcam,United Kingdom |
| Alix antibody | Abcam,United Kingdom |
| Flot1 antibody | Abcam,United Kingdom |
| Calnexin antibody | Abcam,United Kingdom |
