# Supplementary material
Source: Research Square preprint supplement (doi:10.21203/rs.3.rs-9491112/v1)
Supplement: Supplementary file 2 [file 113b9034289713d312462857.docx]

| Gene name | Sequence |
| --- | --- |
| h-miR-26a-5p-F | CTCCTCGCTTCAAGTAATCCAG |
| h-miR-26a-5p-R | TATGCTTGTTCTCGTCTCTGTGTC |
| h-U6-F | CAGCACATATACTAAAATTGGAACG |
| h-U6-R | ACGAATTTGCGTGTCATCC |
| h-MSMO1-F | TGCTTTGGTTGTGCAGTCAT |
| h-MSMO1-R | TCACACAAAAGCACGATTCCA |
| mmu-U6-F | CGCTTCGGCAGCACATATAC |
| mmu-U6-R | TTCACGAATTTGCGTGTCAT |
| mmu- miR-26a-5p-F | CTCCTCGCTTCAAGTAATCCAG |
| mmu- miR-26a-5p-R | TATGCTTGTTCTCGTCTCTGTGTC |
| mmu-β-actin-F | CTGAGAGGGAAATCGTGCGT |
| mmu-β-actin-R | AGGAAGGCTGGAAAAGAGCC |
| mmu-GPX4-F | TGCCCGATATGCTGAGTGTG |
| mmu-GPX4-R | CCCTTGGGCTGGACTTTCAT |
| mmu-MSMO1-F | GCACAGACTCCTTCACCACA |
| mmu-MSMO1-R | AGGGTTTCCAAGGGATGTGC |
