# Supplementary material
Source: Research Square preprint supplement (doi:10.21203/rs.3.rs-9491112/v1)
Supplement: Supplementary file 3 [file cf2b20dd19b64d2a7036e497.docx]

| Contrast | Primer | Sequence |
| --- | --- | --- |
| mimics NC | miR-26a-5p-s | UUCAAGUAAUCCAGGAUAGGCU |
| miR-26a-5p-a | CCUAUCCUGGAUUACUUGAAUU |
| inhibitor NC | inhibitor-26a-5p | AGCCUAUCCUGGAUUACUUGAA |
| Species | Primer | Sequence |
| Human | hMSMO1-si1-s | GGCUGUGGAAUAUGUAGAU |
| hMSMO1-si1-a | AUCUACAUAUUCCACAGCC |
| Human | hMSMO1-si2-s | GGAACUAUAUGUUGAAUAA |
| hMSMO1-si2-a | UUAUUCAACAUAUAGUUCC |
