# Supplementary material
Source: Research Square preprint supplement (doi:10.21203/rs.3.rs-9491112/v1)

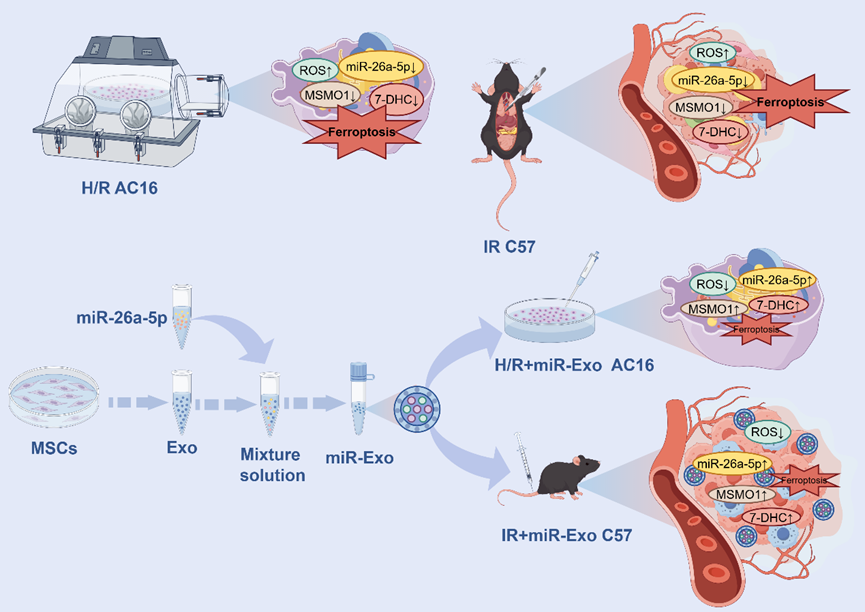

Supplement: Supplementary file 4 [file e633df02573a2ead80891a3d.docx]
